# Supplementary material for: Ribosome profiling reveals a functional role for autophagy in mRNA translational control
Source: PubMed Central journal article supplement (PMC7367890; doi:10.1038/s42003-020-1090-2), 2020-07-17
Supplement: 42003_2020_1090_MOESM2_ESM.pdf [file 42003_2020_1090_MOESM2_ESM.pdf]

## **Description of Additional Supplementary Files**

File Name: Supplementary Data 1

Description: Source data for all plots.

File Name: Supplementary Data 2

Description: Top changes in ribosome occupancy.
